# Supplementary material for: Continuous DeNOx Technology for Improved Flexibility and Reliability of 1000 MW Coal-Fired Power Plants: Engineering Design, Optimization, and Environmental Benefits
Source: MDPI journal article supplement (doi:10.3390/pr12010056), 2023-12-26
Supplement: s1 [file s1]

# Supplementary Files

## Continuous DeNO<sub>x</sub> Technology for Improved Flexibility and Reliability of 1000 MW Coal-Fired Power Plants: Engineering Design, Optimization, and Environmental Benefits

Xinrong Yan <sup>1</sup>, Jianle He <sup>1,\*</sup>, Dong Guo <sup>1</sup>, Yang Zhang <sup>1</sup>, Xiwei Ke <sup>2</sup>, Hongliang Xiao <sup>2</sup>, Chenghang Zheng <sup>3,\*</sup>

and Xiang Gao <sup>3</sup>

<sup>1</sup> Huadian Electric Power Research Institute Co., Ltd., Hangzhou 310013, China

<sup>2</sup> State Key Laboratory of Power Systems, Department of Energy and Power Engineering, Tsinghua University, Beijing 100089, China

<sup>3</sup> State Key Laboratory of Clean Energy Utilization, State Environmental Protection Center for Coal-Fired Air Pollution Control, Zhejiang University, Hangzhou 310027, China

\* hejianle5@163.com

\* zhengch2003@zju.edu.cn

The schematic design has been finalized and is presently undergoing renovation. Below is a picture, displaying solely the external structure.

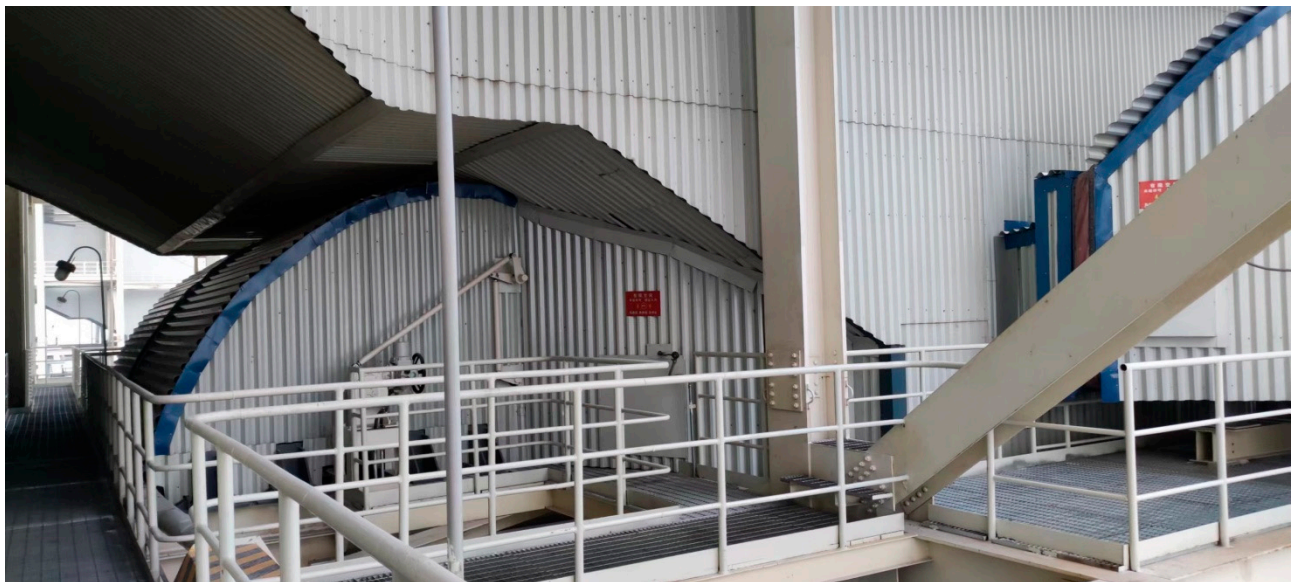

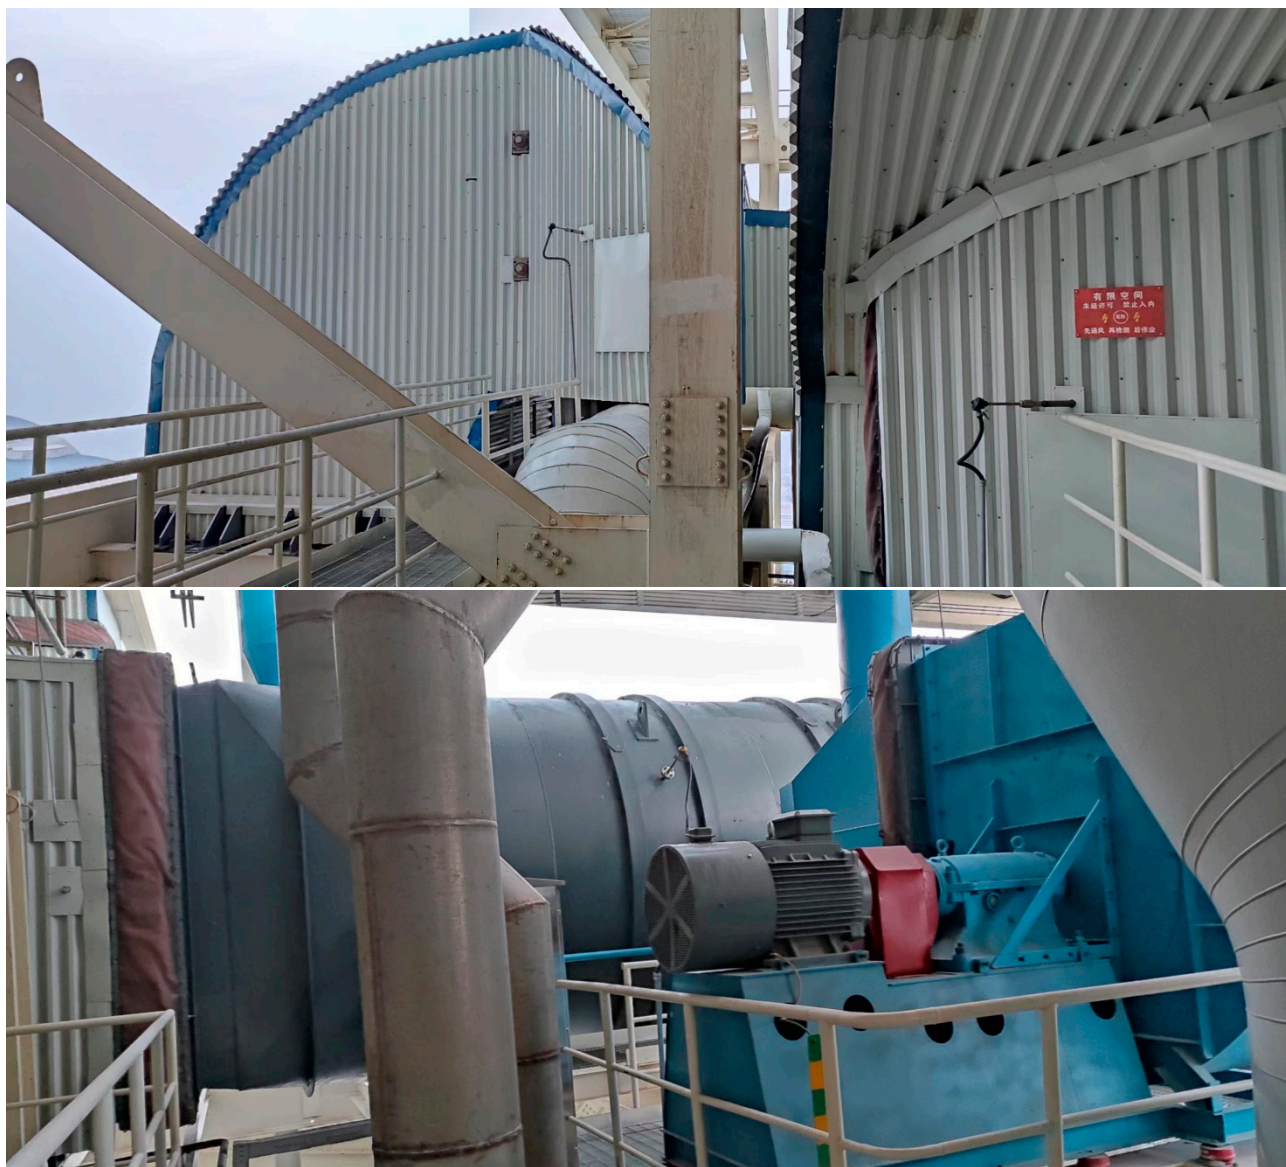

**Figure S1.** The external structure of completed schematic design
